# Supplementary material for: A heterostructure nanofiber film with an enhanced internal electrical field and surface plasmon resonance for efficient microbial removal
Source: Royal Society of Chemistry journal article supplement (doi:10.1039/d4ma00026a), 2024-01-01
Supplement: d4ma00026a1.pdf [file d4ma00026a1.pdf]

## Supplementary Information for

# Heterostructure Nanofiber Film with Enhanced Internal Electrical Field and Surface Plasmon Resonance for Efficient Microbial Removal

*Wanting Li<sup>a</sup>, Jing Yang<sup>b</sup>, Xin Gao<sup>c</sup>, Yiqian Fu<sup>a</sup>, Huiyu He<sup>b</sup>, Pu Wang<sup>b,d,e</sup>, Yudong Hou<sup>c</sup>, Mankang Zhu<sup>c</sup>, and Xiu-Hong Wang<sup>a,d,e</sup> \**

<sup>a</sup>Laboratory for Biomedical Photonics, and <sup>b</sup> Laboratory for Advanced Laser Technology and Applications, School of Physics and Optoelectronic Engineering, Beijing University of Technology; Beijing 100124 China

<sup>c</sup>Key Laboratory of Advanced Functional Materials, Ministry of Education, College of Materials Science and Engineering, Beijing University of Technology; Beijing 100124, China

<sup>d</sup>Key Laboratory of Trans-scale Laser Manufacturing Technology, Ministry of Education, Beijing 100124 China

<sup>e</sup>Beijing Engineering Research Center of Laser Technology; Beijing 100124 China

\*Corresponding author:

Xiu-Hong Wang, Prof.

Beijing University of Technology, 100 Pingleyuan, Chaoyang District, Beijing 100124, China

Tel: 00-86-18612921803; Email: [wxh2012@bjut.edu.cn](mailto:wxh2012@bjut.edu.cn)

Key words:

Ag@BaTiO<sub>3</sub>/PVDF fiber film, surface plasmon resonance, piezocatalytic degradation, reactive oxygen species, anti-bacteria.

## **Table of contents:**

**Fig. S1.** Schematic diagram of the preparation process of PVDF composite fiber film using electrospinning

**Fig. S2.** SEM images and XRD spectra of BTO prepared at different calcination temperatures

**Fig. S3.** Raman spectrum and FTIR spectrum of BTO

**Fig. S4.** TEM images of Ag@BTO

**Fig. S5.** SEM images of PVDF fiber film doped with different BTO contents

**Table 1.** PVDF and BTO/PVDF fibers diameter

**Fig. S6.** Comparison of PFM test results between PVDF fiber and Ag@BTO/PVDF fiber

**Fig. S7.** Comparison of output voltage of PVDF fiber film with different weight percentages of Ag@BTO nanoparticles

**Fig. S8.** Comparison of output voltage between Ag@BTO/PVDF film and DA@Ag@BTO/PVDF film

**Fig. S9.** Comparison of photo-piezocatalytic degradation of MB dye between Ag@BTO/PVDF film and DA@Ag@BTO/PVDF film

**Fig. S10.** Photo-piezocatalytic degradation of RhB dye

**Fig. S11.** Antibacterial experiment of Ag@BTO/PVDF film

## 1. Schematic diagram of the preparation process of PVDF composite fiber film using electrospinning

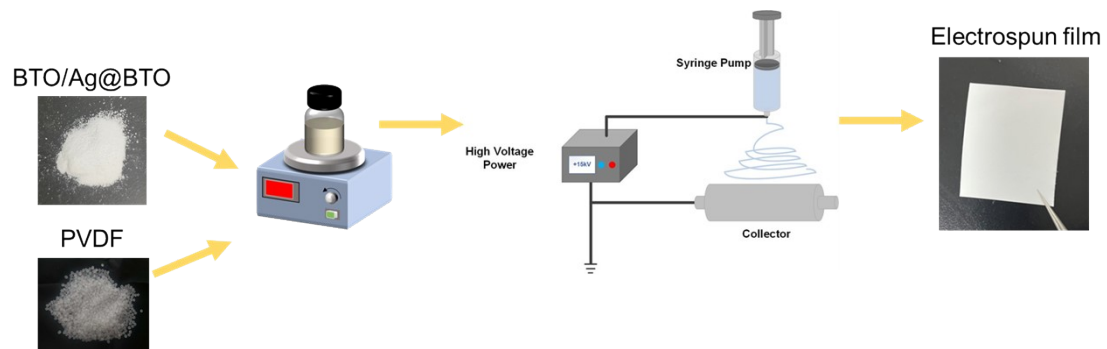

**Fig. S1.** PVDF powder and Ag@BTO (or BTO) nanoparticle were added to DMF solvent. The solution was stirred using a magnetic stirrer until PVDF was completely dissolved and the particles were evenly dispersed. The spinning solution was filled in a 5mL syringe with a inject rate of 0.13mm/min, the distance between the syringe and collector was 15cm and the applied voltage was 15kV. The drum rotating speed was fixed to be 1000rpm.

## 2. SEM images and XRD spectra of BTO prepared at different calcination temperatures

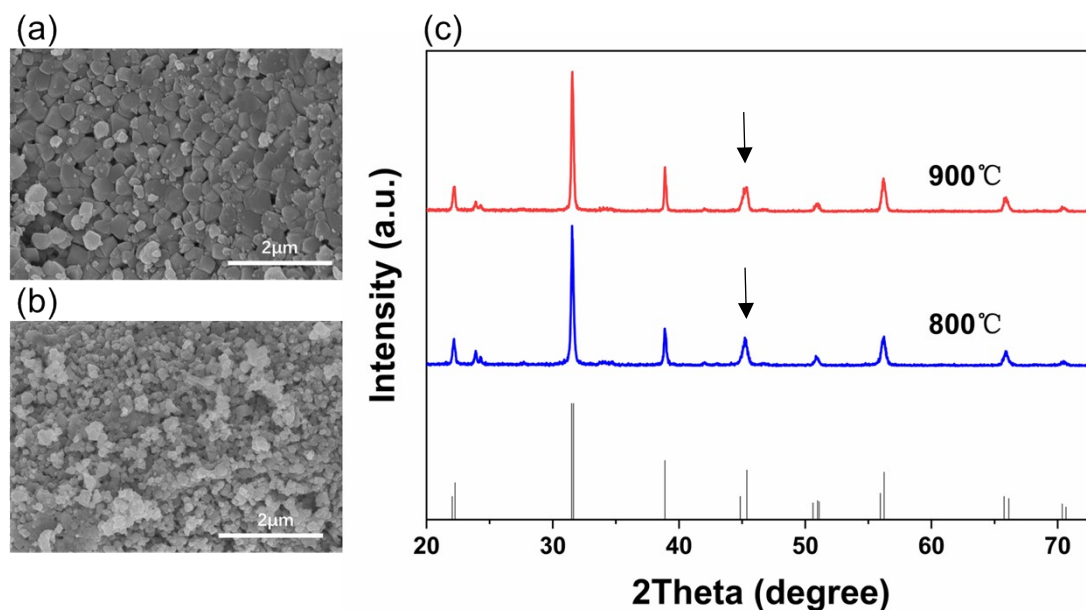

**Fig. S2.** SEM images of BTO prepared using sol-gel method with sintering temperature (a) 900°C and (b) 800°C. As the calcination temperature increased, the particle size increased, and the sintering phenomenon of BTO particles also becomes apparent. (c) XRD spectral comparison of BTO prepared at different sintering temperature (900°C 800°C). We can see that, as the temperature increased, splitting of the 2 $\theta$  diffraction peak splits at 45° became apparent, indicating the presence of tetragonal phase.

### 3. Raman spectrum and FTIR spectrum of BTO

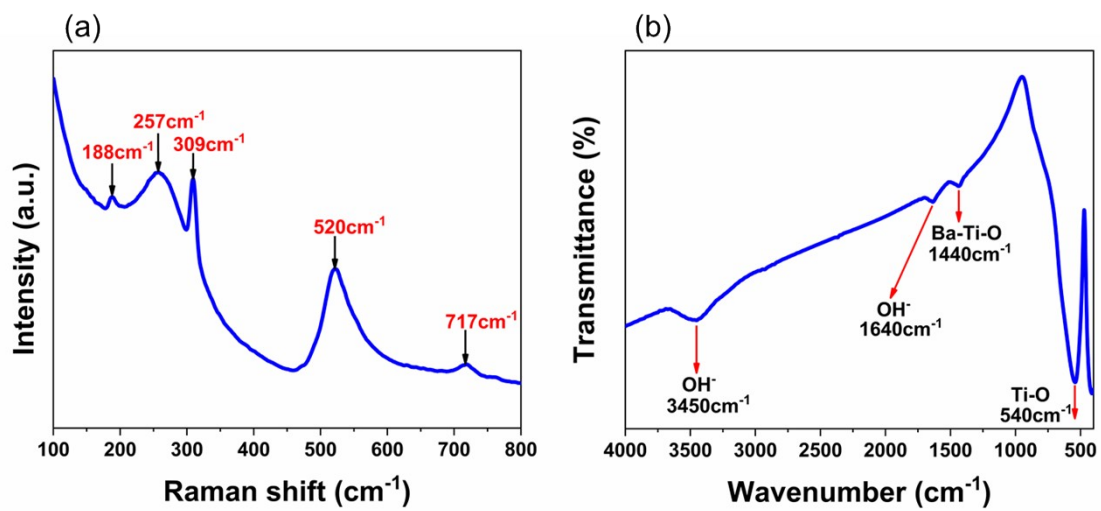

Fig. S3. (a) Raman spectrum of BTO (b) FTIR spectrum of BTO

#### 4. TEM images of Ag@BTO

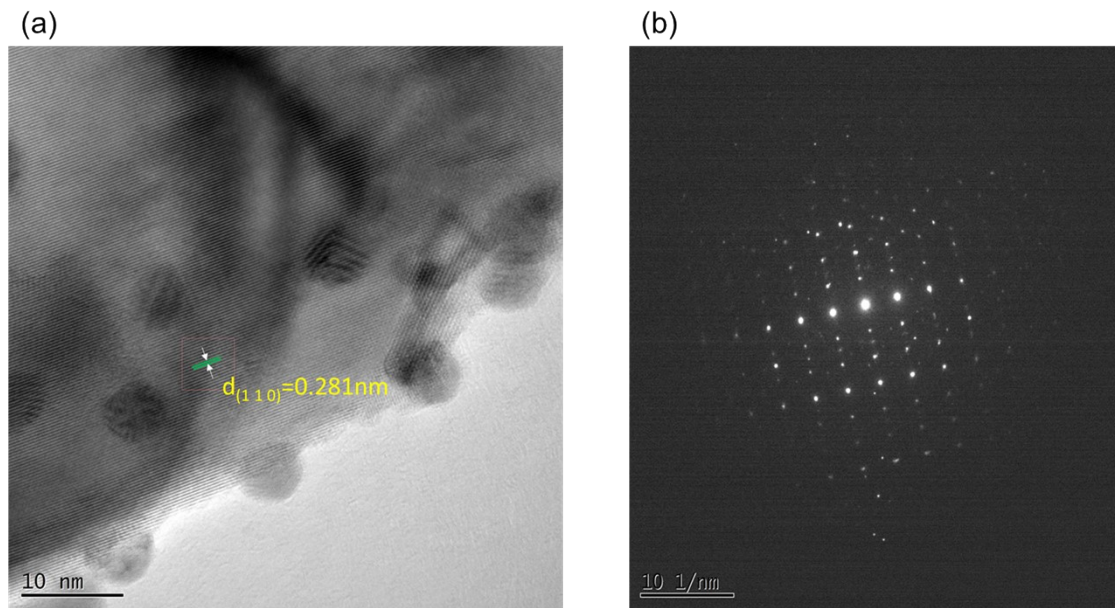

**Fig. S4.** (a) TEM image of Ag@BTO (b) Selected area electron diffraction pattern of BTO. This figure shows distinct lattice fringes and a clear diffraction pattern, indicating the good crystallinity of BTO particles.

## 5. SEM images of PVDF fiber film doped with different BTO contents

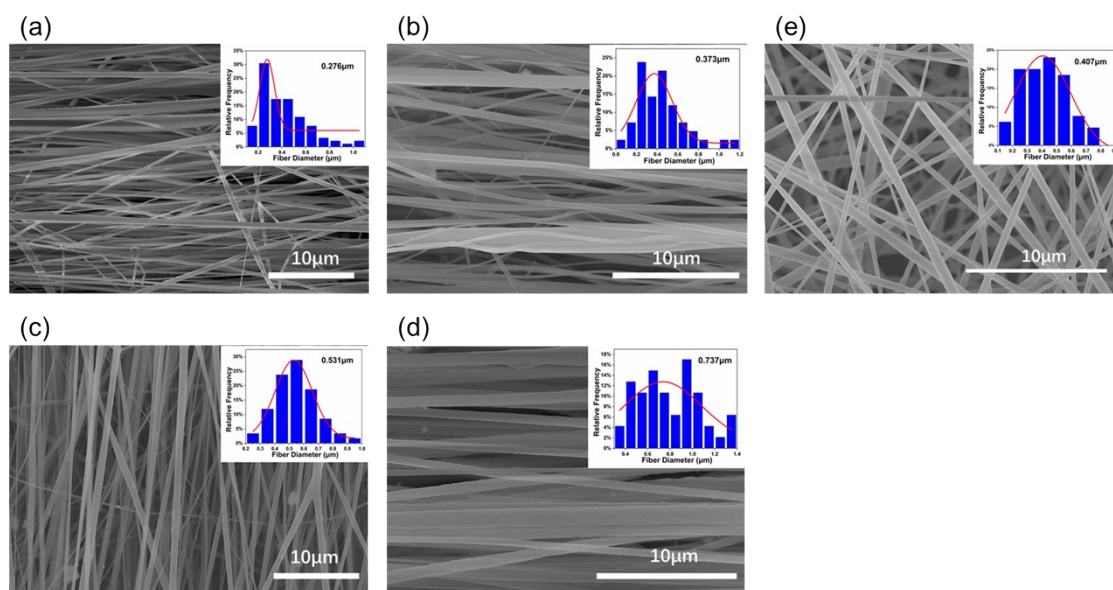

**Fig. S5.** SEM images of randomly selected 70 nanofibers. (a-d) SEM images of PVDF fiber film doped with 0, 2, 4, 6wt% BTO (drum rotating speed: 2800 rpm). The diameters of the fiber were shown in the table below. (e) SEM images of PVDF fiber film (drum rotating speed:140rpm). The inset figures show fiber diameter distribution of film. The diameter was measured using Image J software.

**Table S1. PVDF and BTO/PVDF fibers diameter**

| BaTiO <sub>3</sub> mass fraction (%) | Average fiber diameter (μm) |
|--------------------------------------|-----------------------------|
| 0                                    | 0.276                       |
| 2                                    | 0.373                       |
| 4                                    | 0.531                       |
| 6                                    | 0.737                       |

## 6. Comparison of PFM test results between PVDF fiber and Ag@BTO/PVDF fiber

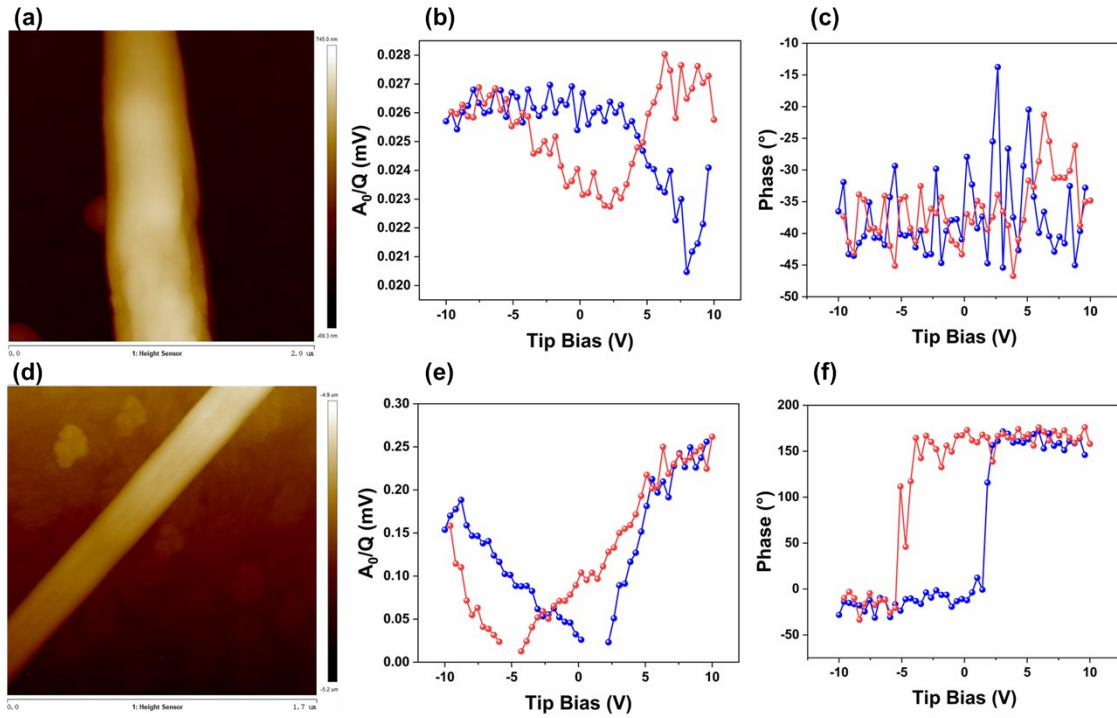

**Fig. S6.** PFM spectroscopy test results. (a,d) AFM images of PVDF fiber and Ag@BTO/PVDF fiber. (b,e) Amplitude ( $A_0/Q$ ) of PVDF fiber and Ag@BTO/PVDF fiber. (c,f) Phase of PVDF fiber and Ag@BTO/PVDF fiber.

The PFM amplitude and phase were measured by applying the voltage from -10V to +10V by keeping the probe at a fixed point on the surface of PVDF single fiber and Ag@BTO/PVDF single fiber. Compared to the PVDF fiber, Ag@BTO/PVDF fiber shown a well defined butterfly curve and the maximum amplitude of Ag@BTO/PVDF is much greater than PVDF. Ag@BTO/PVDF had a significant  $180^\circ$  phase change hysteresis phenomenon, it indicated non-zero remant polarisation. Restricted by PFM equipment, we did not conduct HVSS-PFM experiments.



**7. Comparison of output voltage of PVDF fiber film with different weight percentages of Ag@BTO nanoparticles**

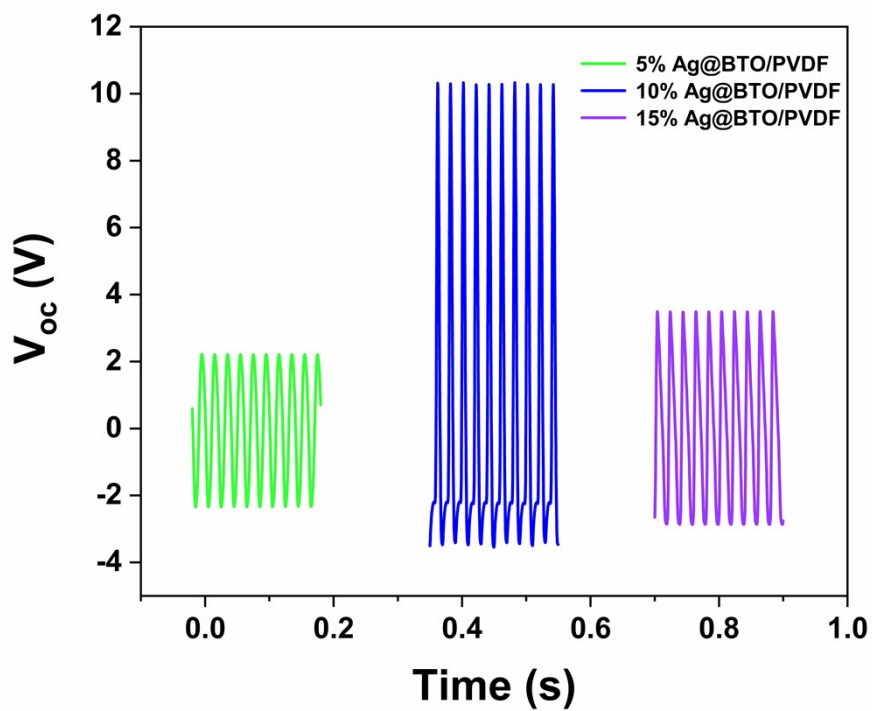

**Fig. S7.** Comparison of output voltage PVDF fiber film with different weight percentages of Ag@BTO nanoparticles

**8. Comparison of output voltage between Ag@BTO/PVDF film and DA@Ag@BTO/PVDF film**

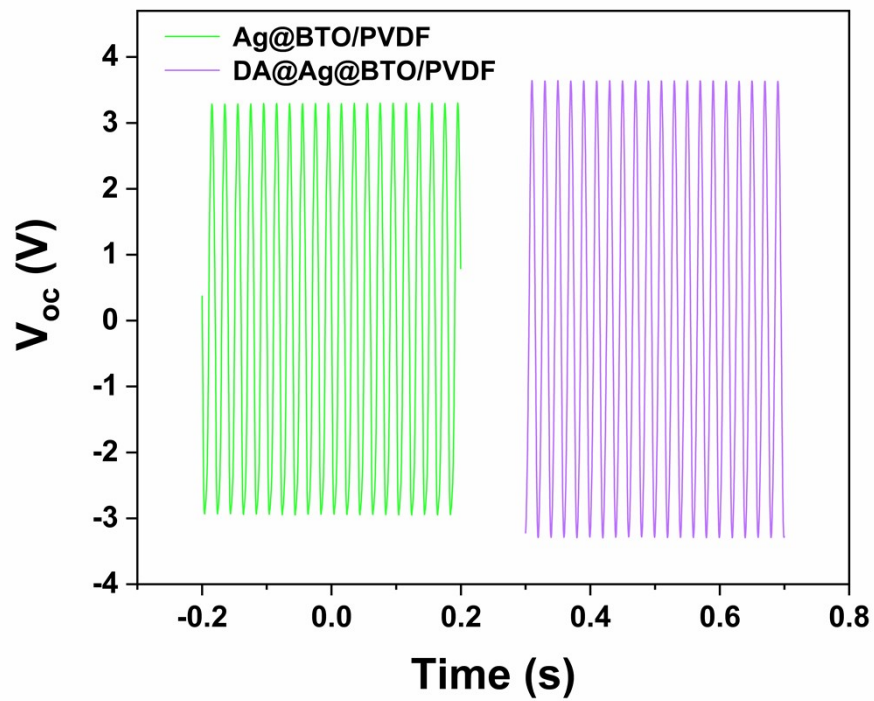

**Fig. S8.** Comparison of output voltage between Ag@BTO/PVDF film and DA@Ag@BTO/PVDF film.

## 9. Comparison of photo-piezocatalytic degradation of MB dye between Ag@BTO/PVDF film and DA@Ag@BTO/PVDF film

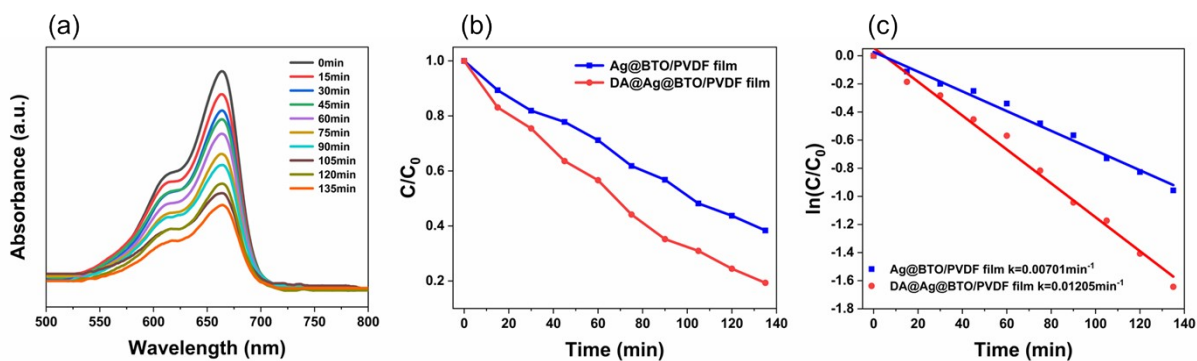

**Fig. S9.** (a) UV-Vis spectra of MB dye solution under photo-piezocatalysis using Ag@BTO/PVDF film after 135min (b) Comparison of time-dependent variation of MB concentration using Ag@BTO/PVDF film and DA@Ag@BTO/PVDF film under photo-piezocatalysis treatment (c) Catalysis rate of MB degradation using Ag@BTO/PVDF film and DA@Ag@BTO/PVDF film under photo-piezocatalysis treatment.

## 10. Photo-piezocatalytic degradation of RhB dye

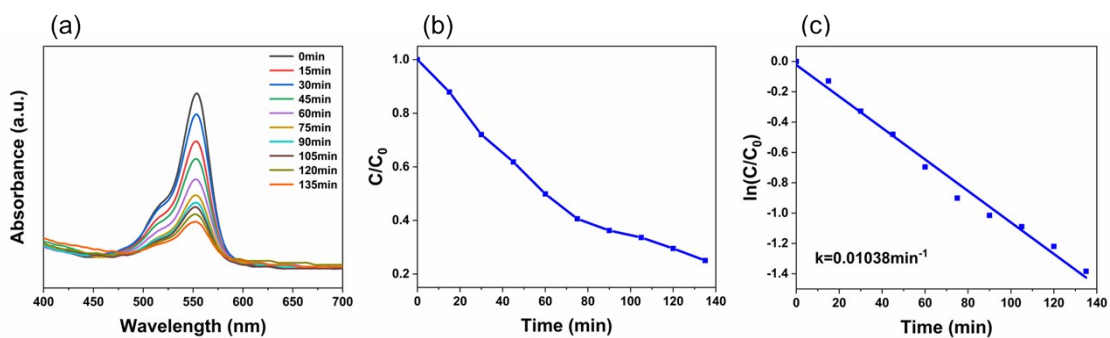

**Fig. S10.** (a) UV-Vis spectra of RhB dye solution undergoing photo-piezocatalysis after 135min (b) Variation in RhB concentration in solution during photo-piezocatalysis process in terms of  $C/C_0$  with vibration time  $t$  (c) Rate of photo-piezocatalysis RhB degradation over the treatment time  $t$

## 11. Antibacterial experiment of Ag@BTO/PVDF film

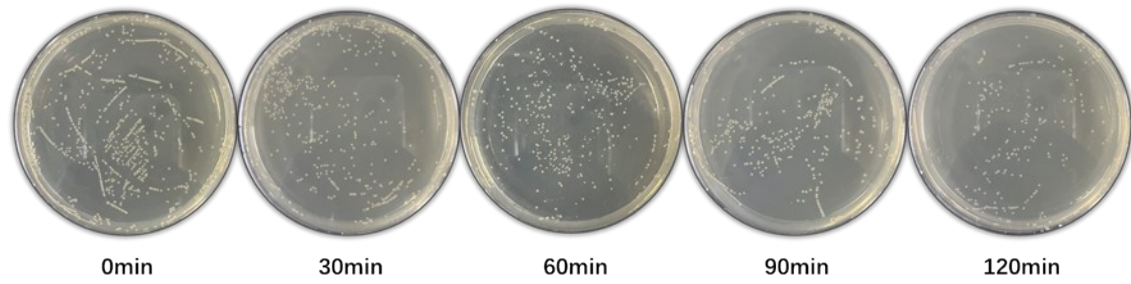

**Fig. S11.** Bacterial colonies of E.coli on L-B agar culture medium at various time  $t$  treated by Ag@BTO/PVDF film
